# Supplementary material
Source: PubMed Central journal article supplement (PMC4125575)
Supplement: NIHMS543043-supplement-Supplemental_Material.pdf [file NIHMS543043-supplement-Supplemental_Material.pdf]

## **SUPPLEMENTAL MATERIAL**

**SUPPLEMENTARY TABLE 1** – Adjusted inpatient mortality among high risk AMI patients admitted to teaching-intensive and non-teaching intensive hospitals in May and July, according to year of admission

| Year | Adjusted mortality in teaching-intensive hospitals |       |                     | Adjusted mortality in non-teaching-intensive hospitals |       |                     | July effect odds ratio | p-value relative to 2002 |
|------|----------------------------------------------------|-------|---------------------|--------------------------------------------------------|-------|---------------------|------------------------|--------------------------|
|      | May                                                | July  | July-May odds ratio | May                                                    | July  | July-May odds ratio |                        |                          |
| 2002 | 26.5%                                              | 27.7% | 1.08                | 26.7%                                                  | 26.1% | 0.96                | 1.12                   | -                        |
| 2003 | 20.8%                                              | 24.6% | 1.27                | 25.1%                                                  | 25.0% | 0.99                | 1.29                   | 0.73                     |
| 2004 | 22.7%                                              | 20.5% | 0.87                | 23.4%                                                  | 24.7% | 1.08                | 0.80                   | 0.38                     |
| 2005 | 16.0%                                              | 17.4% | 1.12                | 22.5%                                                  | 24.2% | 1.11                | 1.01                   | 0.82                     |
| 2006 | 18.0%                                              | 26.9% | 1.78                | 20.8%                                                  | 22.5% | 1.12                | 1.59                   | 0.41                     |
| 2007 | 14.8%                                              | 20.4% | 1.53                | 20.4%                                                  | 19.5% | 0.94                | 1.62                   | 0.37                     |
| 2008 | 14.2%                                              | 21.6% | 1.75                | 18.2%                                                  | 17.0% | 0.91                | 1.93                   | 0.20                     |

Notes: Table presents odds ratio of mortality between July and May for patients admitted to teaching-intensive and non-teaching-intensive hospitals, according to year of hospital admission. The July effect odds ratio reflects the comparison of the July-May mortality odds among teaching-intensive hospitals compared to the July-May mortality odds in non-teaching-intensive hospitals. P-value reflects comparison of July effect odds ratio for patients admitted in a given year, relative to July effects odds ratio for patients admitted in 2002.

**SUPPLEMENTARY TABLE 2** – Adjusted inpatient mortality among patients admitted with AMI to teaching-intensive and non-teaching intensive hospitals in May and July, according to predicted inpatient mortality

| Percentile of predicted mortality    | Adjusted mortality in teaching-intensive hospitals |       |                     | Adjusted mortality in non-teaching-intensive hospitals |       |                     | July effect odds ratio | p-value relative to 0-50 <sup>th</sup> percentile |
|--------------------------------------|----------------------------------------------------|-------|---------------------|--------------------------------------------------------|-------|---------------------|------------------------|---------------------------------------------------|
|                                      | May                                                | July  | July-May odds ratio | May                                                    | July  | July-May odds ratio |                        |                                                   |
| 0 – 50 <sup>th</sup>                 | 0.5%                                               | 0.4%  | 0.65                | 0.7%                                                   | 0.7%  | 0.99                | 0.66                   | -                                                 |
| 50 <sup>th</sup> – 75 <sup>th</sup>  | 5.2%                                               | 5.0%  | 0.96                | 6.7%                                                   | 7.2%  | 1.08                | 0.89                   | 0.42                                              |
| 75 <sup>th</sup> – 90 <sup>th</sup>  | 11.3%                                              | 11.9% | 1.07                | 12.4%                                                  | 12.9% | 1.04                | 1.03                   | 0.29                                              |
| 90 <sup>th</sup> – 100 <sup>th</sup> | 32.3%                                              | 40.1% | 1.40                | 38.4%                                                  | 38.6% | 1.01                | 1.39                   | 0.04                                              |

Notes: Table presents odds ratio of mortality between July and May for patients admitted to teaching-intensive and non-teaching-intensive hospitals, according to percentile of predicted inpatient mortality. The July effect odds ratio reflects the comparison of the July-May mortality odds among teaching-intensive hospitals compared to the July-May mortality odds in non-teaching-intensive hospitals. P-value reflects comparison of July effect odds ratio for patients in a given percentile of predicted mortality, relative to July effects odds ratio for patients in the 0-50<sup>th</sup> percentile of predicted inpatient mortality.
